# Supplementary material for: Investigation on polyvinyl-alcohol-based rapidly gelling hydrogels for containment of hazardous chemicals
Source: Royal Society of Chemistry journal article supplement (doi:10.1039/c6ra14032g), 2016-01-01
Supplement: c6ra14032g1.pdf [file c6ra14032g1.pdf]

Electronic Supplementary Material (ESI) for RSC Advances  
This journal is © The Royal Society of Chemistry 2016

## Supplementary Material

### Investigation on polyvinyl-alcohol-based rapidly gelling hydrogels for containment of hazardous chemicals

Le Yuan<sup>a</sup>, Lijun Ren<sup>b</sup>, Xingtao Tian<sup>b</sup>, Zhiping Huang<sup>b</sup>, YanHua Xiao<sup>b</sup>, Sichen Wei<sup>a</sup>, Zhihua Wang<sup>\*,a</sup>

**Table S1** Experimental variables used for the preparation of the PVA-borax hydrogels

| PVA Concentration (mg/mL) | Borax Concentration (mg/mL) | PVA content (wt%) in hydrogels | Borax:PVA ratio in hydrogels |
|---------------------------|-----------------------------|--------------------------------|------------------------------|
| 62.0                      | 0.6                         | 3                              | 1:100                        |
| 62.0                      | 12.4                        | 3                              | 1:5                          |
| 106.0                     | 1.1                         | 5                              | 1:100                        |
| 106.0                     | 21.2                        | 5                              | 1:5                          |
| 128.0                     | 2.1                         | 6                              | 1:60                         |
| 128.0                     | 3.2                         | 6                              | 1:40                         |
| 128.0                     | 5.1                         | 6                              | 1:25                         |
| 128.0                     | 8.5                         | 6                              | 1:15                         |
| 129.0                     | 25.8                        | 6                              | 1:5                          |
| 198.0                     | 2.5                         | 9                              | 1:80                         |
| 198.0                     | 3.3                         | 9                              | 1:60                         |
| 198.0                     | 5.0                         | 9                              | 1:40                         |
| 199.0                     | 8.0                         | 9                              | 1:25                         |
| 202.0                     | 40.4                        | 9                              | 1:5                          |
| 274.0                     | 2.7                         | 12                             | 1:100                        |
| 274.0                     | 3.4                         | 12                             | 1:80                         |
| 274.0                     | 4.6                         | 12                             | 1:60                         |
| 274.0                     | 6.9                         | 12                             | 1:40                         |
| 274.0                     | 11.0                        | 12                             | 1:25                         |
| 280.0                     | 56.0                        | 12                             | 1:5                          |
| 355.0                     | 3.6                         | 15                             | 1:100                        |
| 355.0                     | 4.4                         | 15                             | 1:80                         |
| 355.0                     | 5.9                         | 15                             | 1:60                         |
| 355.0                     | 8.9                         | 15                             | 1:40                         |
| 355.0                     | 14.2                        | 15                             | 1:25                         |
| 366.0                     | 73.2                        | 15                             | 1:5                          |

**Table S2** The gelation time with different PVA contents and borax:PVA ratios

| PVA content (wt%) | Borax:PVA ratio | Gelation time (second) |
|-------------------|-----------------|------------------------|
| 3                 | 1:100~1:5       | —                      |
| 4.5               | 1:100~1:5       | —                      |
| 6                 | 1:100~1:60      | —                      |
| 6                 | 1:40            | 31                     |
| 6                 | 1:25            | 26                     |
| 6                 | 1:15            | 29                     |
| 6                 | 1:5             | 99                     |
| 9                 | 1:100~1:80      | —                      |
| 9                 | 1:60            | 22                     |
| 9                 | 1:40            | 26                     |
| 9                 | 1:25            | 36                     |
| 9                 | 1:5             | 100                    |
| 12                | 1:100           | —                      |
| 12                | 1:80            | 27                     |
| 12                | 1:60            | 29                     |
| 12                | 1:40            | 34                     |
| 12                | 1:25            | 40                     |
| 12                | 1:5             | 100                    |
| 15                | 1:100           | 27                     |
| 15                | 1:80            | 28                     |
| 15                | 1:60            | 30                     |
| 15                | 1:40            | 35                     |
| 15                | 1:25            | 41                     |
| 15                | 1:5             | 119                    |

—: hydrogel was not formed after 12h.

**Table S3** The stress-strain data of the PVA-borax hydrogels

| PVA content (wt%) | Borax:PVA ratio | Maximum stress (kPa) |
|-------------------|-----------------|----------------------|
| 6                 | 1:5             | 80.50                |
| 6                 | 1:15            | 21.33                |
| 6                 | 1:25            | 7.33                 |
| 6                 | 1:40            | 0.67                 |
| 9                 | 1:25            | 10.00                |
| 12                | 1:25            | 13.27                |
| 15                | 1:25            | 36.59                |

**Table S4** The stress-strain data of the PVA-SA-borax hydrogels

| PVA content (wt%) | SA content (wt%) | Borax:PVA ratio | Maximum stress (kPa) |
|-------------------|------------------|-----------------|----------------------|
| 15                | 0.0              | 1:25            | 36.59                |
| 15                | 0.6              | 1:25            | 69.25                |
